# Supplementary material for: Improved Health-Related Quality of Life in a Phase 3 Islet Transplantation Trial in Type 1 Diabetes Complicated by Severe Hypoglycemia
Source: Oxford University Press journal article supplement (doi:10.2337/dc17-1779), 2018-03-21
Supplement: dc171779supplementarydata.pdf [file dc171779supplementarydata.pdf]

## SUPPLEMENTARY DATA

### Supplementary Appendix S1. The CIT Consortium

**Emory University:** Beth Begley, Jose Cano, Sallie Carpentier, Jennifer Hutchinson, Christian P. Larsen, Johanna Moreno, Marti Sears, Nicole A. Turgeon, Dasia Webster

**Massachusetts General Hospital:** James F. Markmann

**Northwestern University:** Patrice Al-saden, Xioajuan Chen, Angela Hecyk, Xunrong Luo, Mark Molitch, Natalie Monson, Elyse Stuart, Amisha Wallia, Lingjia Wang, Shusen Wang, Xiaomin Zhang

**NIAID:** Christine W. Czarniecki, Julia S. Goldstein, Allison Priore, Mark A. Robien, Elizabeth Schneider

**NIDDK:** Guillermo Arreaza-Rubin, Neal Green

**University of Alberta, Edmonton:** David L. Bigam, Patricia Campbell, Parastoo Dinyari, Tatsuya Kin, Norman M. Kneteman, James Lyon, Andrew Malcolm, Doug O’Gorman, Chris Onderka, Richard Owen, Rena Pawlick, Brad Richer, Shawn Rosichuk, Donna Sarman, Adam Schroeder, Peter A. Senior, A.M. James Shapiro, Lana Toth, Vali Toth, Wendy Zhai

**University of California, San Francisco:** Kristina Johnson, Joan McElroy, Andrew M. Posselt, Marissa Ramos, Tara Rojas, Peter G. Stock, Gregory Szot

**University of Illinois, Chicago:** Barbara Barbaro, Joan Martellotto, Jose Oberholzer, Meirigeng Qi, Yong Wang

**University of Iowa (Data Coordinating Center):** Levent Bayman, Kathryn Chaloner, William R. Clarke, Joseph S. Dillon, Cynthia Diltz, Gregory C. Doelle, Dixie Ecklund, Deb Feddersen, Carol Jaspersen, David-Erick Lafontant, Tina Neill-Hudson, Deb Nollen, Julie Qidwai, Holly Riss, Traci Schwieger, Jamie Willits, Jon Yankey

**University of Miami:** Andrea Curry Corrales, Raquel Faradji, Tatiana Froud, Ana Alvarez Gil, Eva Herrada, Luca Inverardi, Norma Kenyon, Aisha Khan, Elina Linetsky, Eduardo Peixoto, Camillo Ricordi

**University of Minnesota:** Muhamad H. Abdulla, A. N. Balamurugan, Melena D. Bellin, Mary Brandenburg, James V. Harmon, Bernhard J. Hering, Raja Kandaswamy, Gopal Loganathan, Kate Mueller, Klearchos K. Papas, Jayne Pedersen, Joshua J. Wilhelm, Jean Witson

**University of Pennsylvania:** Cornelia Dalton-Bakes, Hongxing Fu, Malek Kamoun, Jane Kearns, Yanjing Li, Chengyang Liu, Eline Luning-Prak, Yanping Luo, Eileen Markmann, Zaw Min, Ali Naji, Maral Palanjian, Michael R. Rickels, Richard Shlansky-Goldberg, Kumar Vivek, Amin Sam Ziaie

**University of Wisconsin:** Dixon B. Kaufman

**Uppsala University:** Olle Korsgren

SUPPLEMENTARY DATA

**Supplementary Appendix S2. Missing Data by Survey**

| Survey                         | Time Point | Total N | Observed and Used N (%) | Partial and Excluded N (%) | Completely Missing N (%) |
|--------------------------------|------------|---------|-------------------------|----------------------------|--------------------------|
| DDS                            | Baseline   | 48      | 44 (92%)                | 3 (6%)                     | 1 (2%)                   |
|                                | Day 75     | 48      | 44 (92%)                | 2 (4%)                     | 2 (4%)                   |
|                                | Day 365    | 48      | 39 (81%)                | 2 (4%)                     | 7 (15%)                  |
|                                | Day 730    | 48      | 27 (56%)                | 5 (10%)                    | 16 (33%)                 |
| HFS                            | Baseline   | 48      | 39 (81%)                | 8 (17%)                    | 1 (2%)                   |
|                                | Day 75     | 48      | 40 (83%)                | 7 (15%)                    | 1 (2%)                   |
|                                | Day 365    | 48      | 35 (73%)                | 6 (13%)                    | 7 (15%)                  |
|                                | Day 730    | 48      | 18 (38%)                | 14 (29%)                   | 16 (33%)                 |
| SF-36                          | Baseline   | 48      | 47 (98%)                | -                          | 1 (2%)                   |
|                                | Day 75     | 48      | 45 (94%)                | -                          | 3 (6%)                   |
|                                | Day 365    | 48      | 41 (85%)                | -                          | 7 (15%)                  |
|                                | Day 730    | 48      | 30 (63%)                | -                          | 18 (38%)                 |
| EQ-5D Health Preference Weight | Baseline   | 48      | 47 (98%)                | 0 (0%)                     | 1 (2%)                   |
|                                | Day 75     | 48      | 47 (98%)                | 0 (0%)                     | 1 (2%)                   |
|                                | Day 365    | 48      | 41 (85%)                | 1 (2%)                     | 6 (13%)                  |
|                                | Day 730    | 48      | 32 (67%)                | 0 (0%)                     | 16 (33%)                 |
| EQ-5D VAS                      | Baseline   | 48      | 46 (96%)                | -                          | 2 (4%)                   |
|                                | Day 75     | 48      | 47 (98%)                | -                          | 1 (2%)                   |
|                                | Day 365    | 48      | 42 (88%)                | -                          | 6 (13%)                  |
|                                | Day 730    | 48      | 31 (65%)                | -                          | 17 (35%)                 |

The DDS total score, HFS total score, SF-36, EQ-5D Health Preference Weight, and EQ-5D VAS broken out by the expected number of observations at each time point and wither the observation was observed, excluded because it was partially complete, or completely missing. The QMSS software automatically handled partial SF-36 questionnaires. The EQ-5D VAS is a single item and therefore it cannot be partially complete. In order to gauge the impact of missing data, we assessed the probability of having missing data based on past survey responses. In this manner, we are able to study whether subjects with worse survey responses tend to have missing or incomplete surveys during follow-up. No associations between past survey responses and the likelihood of missing surveys during follow-up were found (analysis not shown).

SUPPLEMENTARY DATA

**Supplementary Appendix S3. Survey by Primary Endpoint Success at Day 365**

| Survey          | Visit   | Primary Endpoint Success |               |               | Primary Endpoint Failure |               |               | p-value |
|-----------------|---------|--------------------------|---------------|---------------|--------------------------|---------------|---------------|---------|
|                 |         | N                        | Mean (SD)     | Median (IQR)  | N                        | Mean (SD)     | Median (IQR)  |         |
| DDS Total Score | Day 365 | 36                       | 1.45 (0.47)   | 1.29 (0.59)   | 3                        | 2.14 (0.71)   | 2.06 (1.41)   | 0.0573  |
|                 | Day 730 | 24                       | 1.27 (0.29)   | 1.21 (0.38)   | 3                        | 1.69 (0.35)   | 1.65 (0.71)   | 0.0537  |
| HFS Total Score | Day 365 | 32                       | 0.47 (0.56)   | 0.22 (0.78)   | 3                        | 1.28 (1.24)   | 1.35 (2.48)   | 0.3265  |
|                 | Day 730 | 16                       | 0.33 (0.47)   | 0.13 (0.39)   | 2                        | 1.09 (1.48)   | 1.09 (2.09)   | 0.4379  |
| SF-36 PCS       | Day 365 | 39                       | 52.46 (7.84)  | 54.39 (8.47)  | 2                        | 53.54 (4.93)  | 53.54 (6.97)  | 0.9759  |
|                 | Day 730 | 26                       | 53.06 (9.15)  | 56.56 (7.81)  | 4                        | 48.41 (8.40)  | 51.16 (12.12) | 0.0818  |
| SF-36 MCS       | Day 365 | 39                       | 51.95 (9.09)  | 54.61 (13.20) | 2                        | 50.02 (7.25)  | 50.02 (10.25) | 0.5854  |
|                 | Day 730 | 26                       | 55.12 (6.68)  | 57.35 (7.88)  | 4                        | 49.69 (10.32) | 51.74 (14.52) | 0.3241  |
| EQ-5D VAS       | Day 365 | 39                       | 82.77 (14.97) | 85.00 (22.00) | 3                        | 84.00 (5.29)  | 82.00 (10.00) | 0.8315  |
|                 | Day 730 | 27                       | 86.44 (15.51) | 91.00 (17.00) | 4                        | 81.00 (15.51) | 84.50 (23.00) | 0.2932  |

The DDS total score, HFS total score, SF-36 PCS, SF-36 MCS, and EQ-5D VAS broken out by primary endpoint success or failure at day 365 and day 730 following initial islet transplantation. Tests for differences between successes and failures at each visit were performed using the Mann-Whitney U test and the exact p-value is reported.

SUPPLEMENTARY DATA

**Supplementary Appendix S4. Survey by Insulin Independence at Day 365**

| Survey          | Visit   | Insulin Independence Success |               |               | Insulin Independence Failure |               |               | p-value |
|-----------------|---------|------------------------------|---------------|---------------|------------------------------|---------------|---------------|---------|
|                 |         | N                            | Mean (SD)     | Median (IQR)  | N                            | Mean (SD)     | Median (IQR)  |         |
| DDS Total Score | Day75   | 10                           | 1.72 (0.49)   | 1.62 (0.88)   | 34                           | 1.87 (0.78)   | 1.62 (0.76)   | 1.0000  |
|                 | Day 365 | 21                           | 1.38 (0.47)   | 1.24 (0.41)   | 18                           | 1.65 (0.53)   | 1.59 (0.47)   | 0.0405  |
|                 | Day 730 | 8                            | 1.34 (0.32)   | 1.35 (0.32)   | 19                           | 1.31 (0.33)   | 1.24 (0.59)   | 0.6478  |
| HFS Total Score | Day 75  | 9                            | 1.09 (1.06)   | 0.65 (2.04)   | 31                           | 1.40 (0.83)   | 1.26 (1.30)   | 0.3390  |
|                 | Day 365 | 19                           | 0.40 (0.59)   | 0.09 (0.39)   | 16                           | 0.72 (0.70)   | 0.67 (1.11)   | 0.2038  |
|                 | Day 730 | 4                            | 0.40 (0.52)   | 0.17 (0.54)   | 14                           | 0.41 (0.66)   | 0.07 (0.43)   | 0.4484  |
| SF-36 PCS       | Day 75  | 10                           | 50.61 (5.98)  | 52.20 (10.14) | 35                           | 49.79 (8.61)  | 49.55 (9.81)  | 0.8806  |
|                 | Day 365 | 23                           | 52.95 (7.76)  | 54.24 (9.75)  | 18                           | 51.97 (7.78)  | 54.64 (6.97)  | 0.7229  |
|                 | Day 730 | 8                            | 56.74 (2.26)  | 56.62 (3.43)  | 22                           | 50.88 (10.10) | 54.47 (9.64)  | 0.1812  |
| SF-36 MCS       | Day 75  | 10                           | 55.57 (3.86)  | 56.35 (4.61)  | 35                           | 52.31 (10.69) | 54.66 (11.39) | 0.7639  |
|                 | Day 365 | 23                           | 52.29 (8.94)  | 55.53 (14.43) | 18                           | 51.31 (9.17)  | 53.24 (11.62) | 0.6647  |
|                 | Day 730 | 8                            | 55.71 (7.33)  | 57.64 (8.57)  | 22                           | 53.92 (7.37)  | 56.11 (9.88)  | 0.5420  |
| EQ-5D VAS       | Day 75  | 11                           | 77.36 (16.63) | 80.00 (21.00) | 36                           | 79.58 (15.96) | 80.00 (17.50) | 0.7233  |
|                 | Day 365 | 23                           | 81.52 (17.10) | 85.00 (24.00) | 19                           | 84.47 (10.68) | 87.00 (15.00) | 0.7902  |
|                 | Day 730 | 8                            | 88.50 (11.86) | 93.50 (20.50) | 23                           | 84.78 (16.53) | 91.00 (16.00) | 0.5711  |

The DDS total score, HFS total score, SF-36 PCS, SF-36 MCS, and EQ-5D VAS broken out by insulin independence success or failure at day 75, day 365, and day 730 following initial islet transplantation. Tests for differences between successes and failures at each visit were performed using the Mann-Whitney U test and the p-value based on the normal approximation is reported.

SUPPLEMENTARY DATA

**Supplementary Appendix S5. Impact of Occurrence of SHE on Survey**

| Survey | Score                           | Mean (SE)    | 95% CI          |
|--------|---------------------------------|--------------|-----------------|
| DDS    | Total                           | -            | -               |
|        | Emotional Burden                | 1.08 (0.42)  | (0.23, 1.92)    |
|        | Physician-Related Distress      | -            | -               |
|        | Regimen-Related Distress        | -            | -               |
|        | Interpersonal Distress          | -            | -               |
| HFS    | Total                           | -            | -               |
|        | Hypoglycemia Avoidance Behavior | 0.48 (0.32)  | (-0.13, 1.07)   |
|        | Worry about Hypoglycemia        | 0.12 (0.38)  | (-0.65, 0.87)   |
| SF-36  | PCS                             | 2.64 (2.79)  | (-2.83, 8.77)   |
|        | MCS                             | -7.85 (3.34) | (-14.79, -1.21) |
| EQ-5D  | VAS                             | -1.61 (5.69) | (-12.08, 10.16) |

Supplemental Appendix S5 Legend:

The mean estimates, standard errors, and associated bootstrap 95% confidence intervals for the SHE incidence indicator of the longitudinal models are shown. A dash (-) indicates that model selection removed the SHE incidence indicator from the model. Included in candidate models were patient characteristics (age, disease duration, gender, and baseline BMI), metabolic outcomes (HbA<sub>1c</sub> and basal and 90-minute C-peptide from mixed meal tolerance tests), and a time-varying indicator of whether or not a subject had experienced an SHE. This indicator represents the impact on survey responses, of moving from a state of freedom from SHE to a state where at least one SHE has occurred. Model selection was performed in two steps: first by checking variance inflation factors to assess multicollinearity of the covariates; and second by using LASSO regression, making use of a leave-one-cluster-out cross-validation guided by minimizing the Akaike Information Criterion to select the tuning parameter.

## SUPPLEMENTARY DATA

1. Abdulla, Muhamad H
2. Al-saden, Patrice
3. Arreaza-Rubin, Guillermo
4. Balamurugan, Appakalai N
5. Barbado, Barbara
6. Bayman, Levent
7. Begley, Beth
8. Bellin, Melena D
9. Bigam, David L
10. Brandenburg, Mary
11. Campbell, Patricia
12. Cano, Jose
13. Carpentier, Sallie
14. Chaloner, Kathryn
15. Chen, Xiaojuan
16. Clarke, William R
17. Corrales, Andrea Curry
18. Czarniecki, Christine W
19. Dalton-Bakes, Cornelia
20. Dillon, Joseph S
21. Diltz, Cynthia
22. Dinyari, Parastoo
23. Doelle, Gregory C
24. Ecklund, Dixie J
25. Faradji, Raquel
26. Feddersen, Deb
27. Froud, Tatiana
28. Fu, Hongxing
29. Gil, Ana Alvarez
30. Gloer, Kate
31. Goldstein, Julia S
32. Green, Neal
33. Harmon, James V
34. Hecyk, Angela
35. Hering, Bernhard J
36. Herrada, Eva
37. Hutchinson, Jennifer
38. Inverardi, Luca
39. Jasperson, Carol
40. Johnson, Kristina
41. Kamoun, Malek
42. Kandaswamy, Raja
43. Kang, Daniel
44. Kaufman, Dixon B
45. Kearns, Jane
46. Kenyon, Norma
47. Khan, Aisha
48. Kin, Tatsuya
49. Kneteman, Norman M

## SUPPLEMENTARY DATA

50. Korsgren, Olle
51. Lafontant, David-Erick
52. Larsen, Christian P
53. Li, Yanjing
54. Linetsky, Elina
55. Liu, Chengyang
56. Loganathan, Gopal
57. Luning-Prak, Eline
58. Luo, Xunrong
59. Luo, Yanping
60. Lyon, James
61. Malcom, Andrew
62. Markmann, Eileen
63. Markmann, James F
64. Martellotto, Joan
65. McElroy, Joan
66. Min, Zaw
67. Molitch, Mark
68. Monson, Natalie
69. Moreno, Johanna
70. Mueller, Kate
71. Naji, Ali
72. Neill-Hudson, Tina
73. Nollen, Deb
74. O’Gorman, Doug
75. Oberholzer, Jose
76. Onderka, Chris
77. Owen, Richard
78. Papas, Klearchos K
79. Palanjian, Maral
80. Pawlick, Rena
81. Pedersen, Jayne
82. Peixoto, Eduardo
83. Posselt, Andrew M
84. Priore, Allison
85. Qi, Meirigeng
86. Qidwai, Julie C
87. Ramos, Marissa
88. Richer, Brad
89. Rickels, Michael R
90. Ricordi, Camillo
91. Riss, Holly
92. Robien, Mark A
93. Rojas, Tara
94. Rosichuk, Shawn
95. Sarman, Donna
96. Schneider, Elizabeth
97. Schroeder, Adam
98. Schwieger, Traci

## SUPPLEMENTARY DATA

99. Shlansky-Goldberg, Richard
100. Sears, Marti
101. Senior, Peter A
102. Shapiro, A.M. James
103. Stock, Peter G
104. Stuart, Elyse
105. Szot, Gregory
106. Toth, Lana
107. Toth, Vali
108. Turgeon, Nicole A
109. Vivek, Kumar
110. Wallia, Amisha
111. Wang, Lingjia
112. Wang, Shusen
113. Wang, Yong
114. Webster, Dasia
115. Wilhelm, Joshua J
116. Willits, Jamie
117. Witson, Jean
118. Yankey, Jon
119. Ziaie, Amin Sam
120. Zhang, Xiaomin
121. Zhai, Wendy
